# Supplementary material for: Highly selective fluorescence detection of l-selenium-methylselenocysteine in selenium-enriched Cardamine violifolia
Source: Royal Society of Chemistry journal article supplement (doi:10.1039/d4ay00320a), 2024-01-01
Supplement: d4ay00320a1.pdf [file d4ay00320a1.pdf]

## Supporting Information

### Highly selective fluorescence detection of L-selenium-methylselenocysteine in Selenium-enriched *Cardamine violifolia*

Xiaoran Shi<sup>1</sup>, Hui Zhao<sup>1</sup>, Han Zhang<sup>1</sup>, Qunfang Li<sup>1</sup>, Fangming Lou<sup>\*1,2</sup>

(1. School of Chemistry and Environmental Engineering, Hubei Minzu University, Enshi 445000, China; 2. Hubei Key Laboratory of Selenium Resource Research and Biological Application (Hubei Minzu University), Enshi 445000, China)

#### Table of Contents:

**Figure S1** High resolution Mn (2p) XPS spectra of g-C<sub>3</sub>N<sub>4</sub>-MnO<sub>2</sub> nanocomposite.

**Figure S2** Spectral overlap showing the UV-vis absorption spectrum of MnO<sub>2</sub> nanoparticles (black) and the fluorescence emission spectrum of the g-C<sub>3</sub>N<sub>4</sub> nanosheet (red).

**Figure S3** UV-vis absorption spectra of g-C<sub>3</sub>N<sub>4</sub> nanosheet at different concentrations of KMnO<sub>4</sub>.

**Figure S4** (A) Fluorescence spectra of g-C<sub>3</sub>N<sub>4</sub> nanosheet prepared by different concentrations of KMnO<sub>4</sub>. (B) corresponding photographs of the g-C<sub>3</sub>N<sub>4</sub>-MnO<sub>2</sub> nanocomposite aqueous solutions formed with increasing KMnO<sub>4</sub> concentrations.

**Figure S5** Fluorescence intensity of L-SeMC and g-C<sub>3</sub>N<sub>4</sub>-MnO<sub>2</sub> nanocomposite mixed at different temperatures (A) and times (B).

**Figure S6** The influence of pH on the fluorescence detection of L-SeMC by the g-C<sub>3</sub>N<sub>4</sub>-MnO<sub>2</sub> nanocomposite.

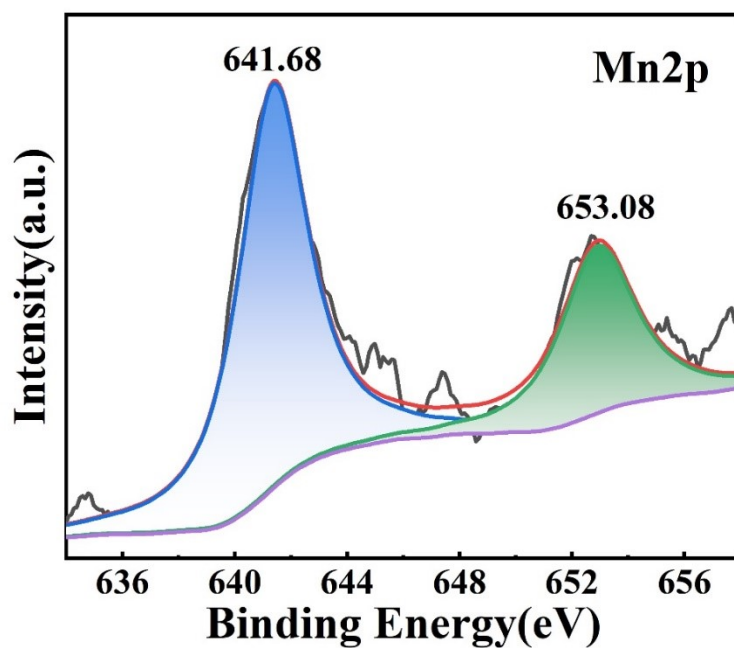

**Figure S1.** High resolution Mn (2p) XPS spectra of g-C<sub>3</sub>N<sub>4</sub>-MnO<sub>2</sub> nanocomposite.

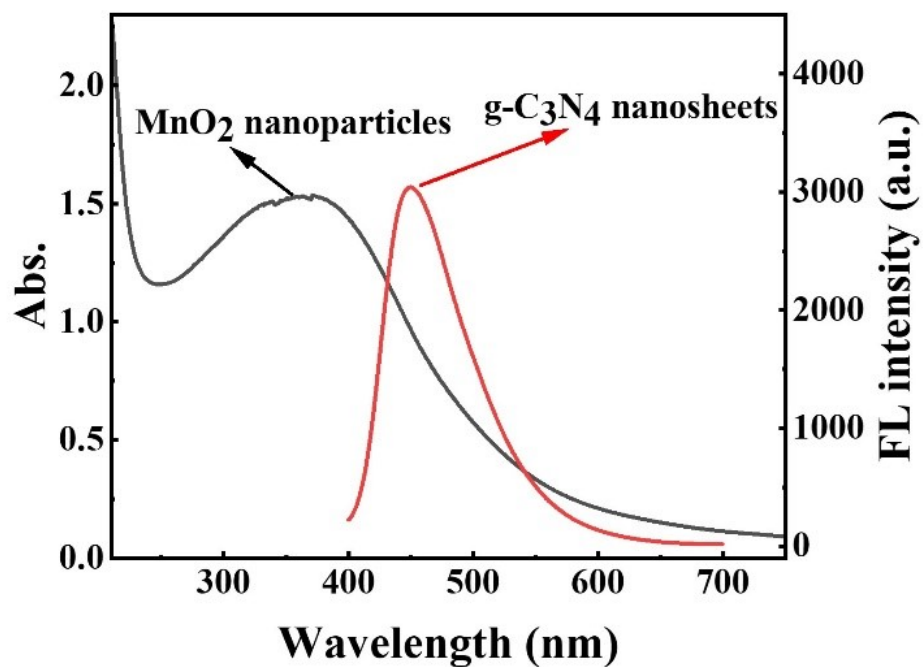

**Figure S2.** Spectral overlap showing the UV-vis absorption spectrum of MnO<sub>2</sub> nanoparticles (black) and the fluorescence emission spectrum of the g-C<sub>3</sub>N<sub>4</sub> nanosheet (red).

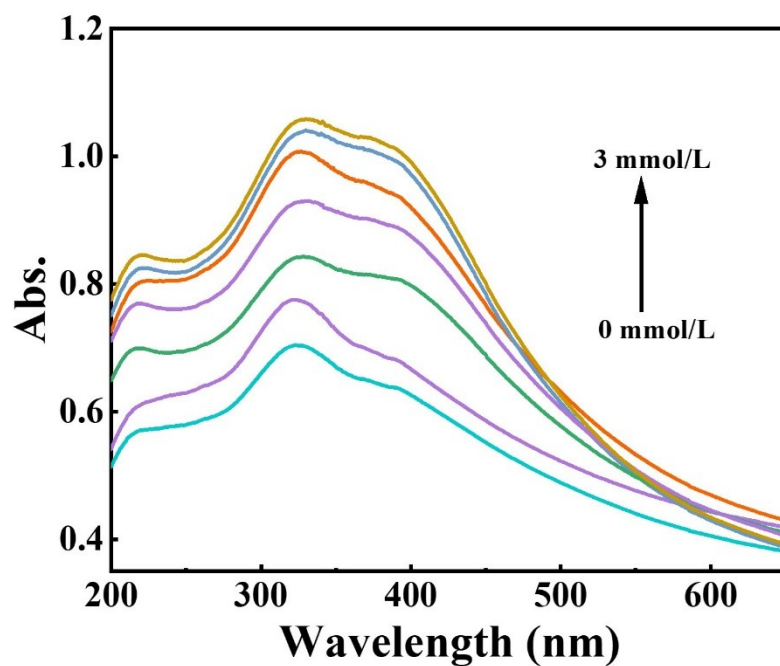

**Figure S3.** UV-vis absorption spectrum of g-C<sub>3</sub>N<sub>4</sub> nanosheet prepared by different concentrations of KMnO<sub>4</sub>(0, 0.1, 0.2, 0.5, 1, 2, 3 mmol/L)

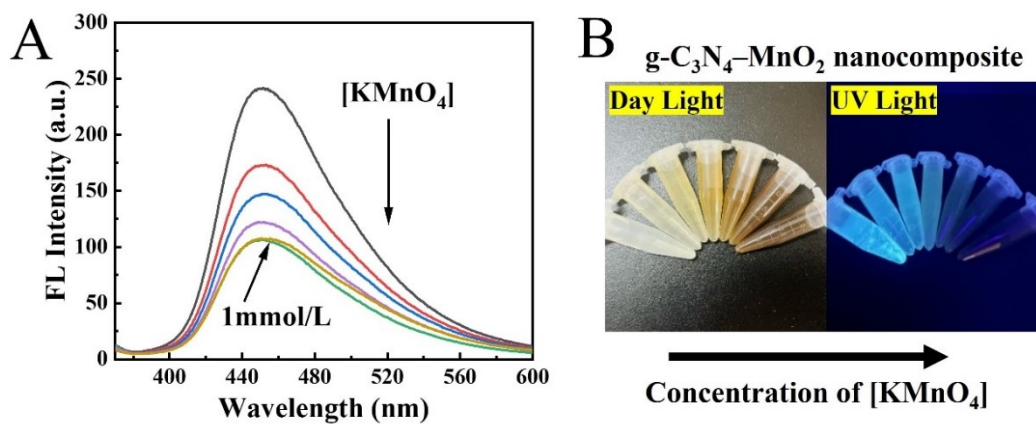

**Figure S4.** (A) Fluorescence spectra of g-C<sub>3</sub>N<sub>4</sub> nanosheet prepared by different concentrations of KMnO<sub>4</sub>, excitation wavelength was 320 nm. (B) corresponding photographs of the g-C<sub>3</sub>N<sub>4</sub>-MnO<sub>2</sub> nanocomposite aqueous solutions formed with increasing KMnO<sub>4</sub> concentrations.

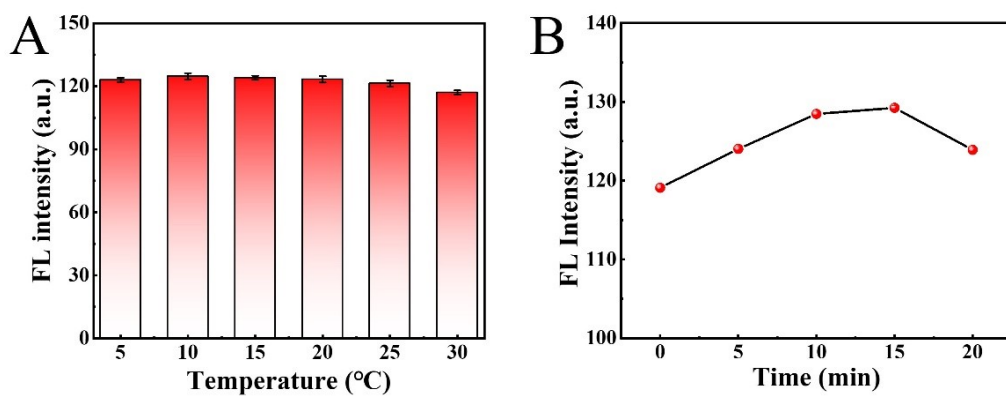

**Figure S5.** Fluorescence intensity of L-SeMC and g-C<sub>3</sub>N<sub>4</sub>-MnO<sub>2</sub> nanocomposite mixed at different temperatures (A) and times (B).

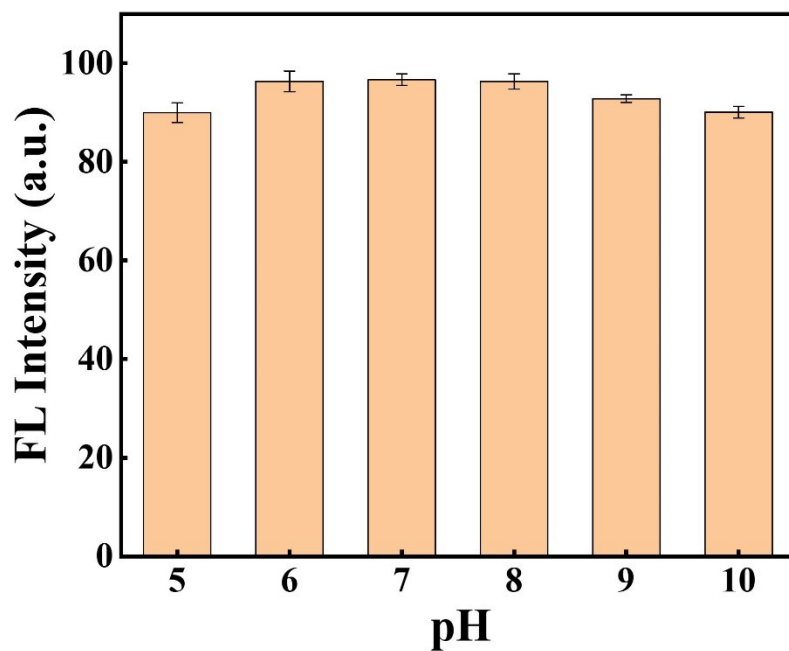

**Figure S6.** The influence of pH on the fluorescence detection of L-SeMC by the g-C<sub>3</sub>N<sub>4</sub>-MnO<sub>2</sub> nanocomposite.
